# Supplementary material for: Enhanced Efficacy of Ciprofloxacin and Tobramycin against Staphylococcus aureus When Combined with Corydalis Tuber and Berberine through Efflux Pump Inhibition
Source: MDPI journal article supplement (doi:10.3390/antibiotics13050469), 2024-05-20
Supplement: s1 [file s1]

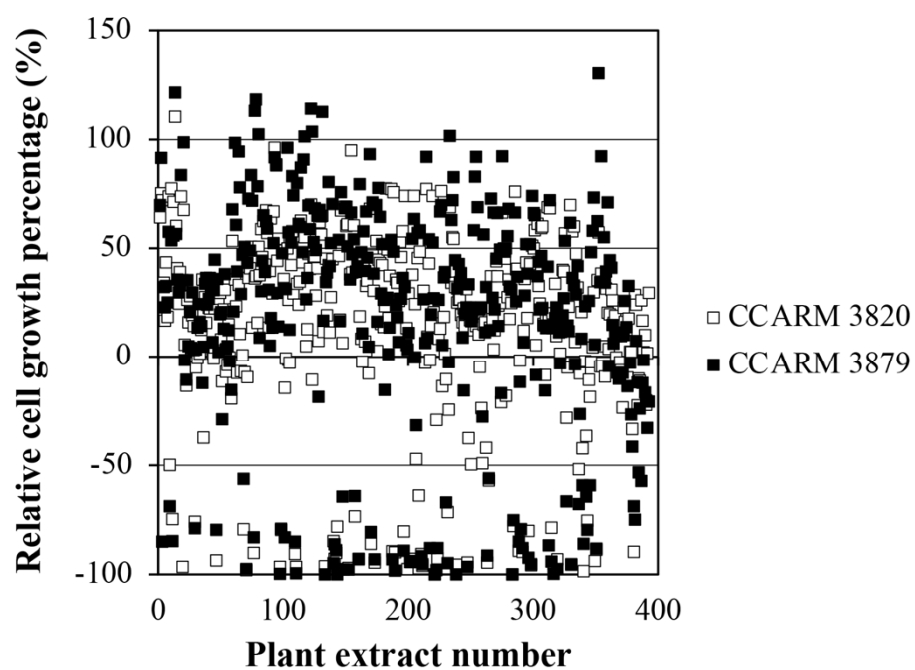

**Supplementary Material Figure S1.** Changes in the cell growth of two methicillin-resistant *Staphylococcus aureus* strains, CCARM 3820 (□) and CCARM 3879 (■), after a 24 h treatment with 512 mg/L each of 392 methanolic plant extracts and 4 mg/L of oxacillin (1/8 MIC).

**Supplementary Material Table S1.** Methanolic extracts that inhibited the growth of the methicillin-resistant *Staphylococcus aureus* (MRSA) strains MRSA CCARM 3820 and MRSA CCARM 3879 by more than 80% when incubated at 512 mg/L with oxacillin (1/8 MIC, 4 mg/L) for 24 h.

| Extract                                 | MRSA CCARM 3820          | MRSA CCARM 3879          |
|-----------------------------------------|--------------------------|--------------------------|
|                                         | Relative cell growth (%) | Relative cell growth (%) |
| <b>Alpiniae Oxyphyllae Fructus</b>      | <b>-94.59</b>            | <b>-96.49</b>            |
| Araliae Continentalis Radix             | -85.90                   | -80.41                   |
| Cannabis Fructus                        | -90.52                   | -91.42                   |
| Cinnamomi Cortex                        | -96.34                   | -99.65                   |
| <b>Corydalis Tuber</b>                  | <b>-89.08</b>            | <b>-85.00</b>            |
| Crassirhizomae Rhizoma                  | -97.03                   | -97.77                   |
| Fruit of <i>Myrciaria dubia</i>         | -93.05                   | -97.51                   |
| Impatiens Semen                         | -93.09                   | -92.66                   |
| Kaempferiae Rhizoma                     | -96.03                   | -95.34                   |
| Leaf of <i>Origanum vulgare</i>         | -95.01                   | -99.77                   |
| Leaf of <i>Pinus densiflora</i>         | -100                     | -100                     |
| Leaf of <i>Rosmarinus officinalis</i> . | -94.45                   | -92.99                   |
| Leaf of <i>Salvia officinalis</i>       | -95.69                   | -95.12                   |
| Leaf of <i>Silybum marianum</i>         | -88.49                   | -88.13                   |
| <b>Lepidii seu Descurainiae Semen</b>   | <b>-90.55</b>            | <b>-84.88</b>            |
| <b>Linderæ Radix</b>                    | <b>-95.50</b>            | <b>-100</b>              |
| Magnoliae Cortex                        | -89.51                   | -87.91                   |
| Mori Cortex Radicis                     | -97.88                   | -97.56                   |
| Ocimi Herba                             | -89.37                   | -92.95                   |
| Osterici Radix                          | -89.97                   | -88.87                   |
| Perillae Japonicae Semen                | -95.38                   | -95.34                   |
| Perilliae Semen                         | -89.96                   | -82.91                   |
| Piperis Nigri Fructus                   | -96.15                   | -100                     |
| Psoraleae Semen                         | -92.81                   | -94.30                   |
| Pulvis Myristicae Seminis               | -98.41                   | -85.87                   |
| Ricini Semen                            | -100                     | -100                     |
| Saposhnikoviae Radix                    | -89.85                   | -98.13                   |
| Sappan Lignum                           | -92.42                   | -87.78                   |
| Siegesbeckiae Herba                     | -84.60                   | -94.78                   |
| Sophorae Radix                          | -97.47                   | -97.80                   |
| Syzygii Flos                            | -96.57                   | -99.49                   |
| Terminaliae Fructus                     | -92.69                   | -86.12                   |
| <b>Thujae Semen</b>                     | <b>-80.15</b>            | <b>-89.08</b>            |
| Xanthii Fructus                         | -94.40                   | -91.37                   |
| Zedoariae Rhizoma                       | -94.14                   | -93.79                   |

**Supplementary Material Table S2.** Changes in the cell density of methicillin-resistant *Staphylococcus aureus* (MRSA) strains MRSA CCARM 3820 and MRSA CCARM 3879 after incubation with oxacillin (1/8 MIC, 4 mg/L) and five selected ethanolic extracts (512 mg/L) for 24 h.

| Extract                        | MRSA CCARM 3820          | MRSA CCARM 3879          |
|--------------------------------|--------------------------|--------------------------|
|                                | Relative cell growth (%) | Relative cell growth (%) |
| Alpiniae Oxyphyllae Fructus    | -34.02                   | -76.44                   |
| <b>Corydalis Tuber</b>         | <b>-94.25</b>            | <b>-96.83</b>            |
| Lepidii seu Descurainiae Semen | -30.30                   | -29.78                   |
| <b>Linderae Radix</b>          | <b>-96.25</b>            | <b>-95.03</b>            |
| Thujae Semen                   | -57.06                   | -96.53                   |

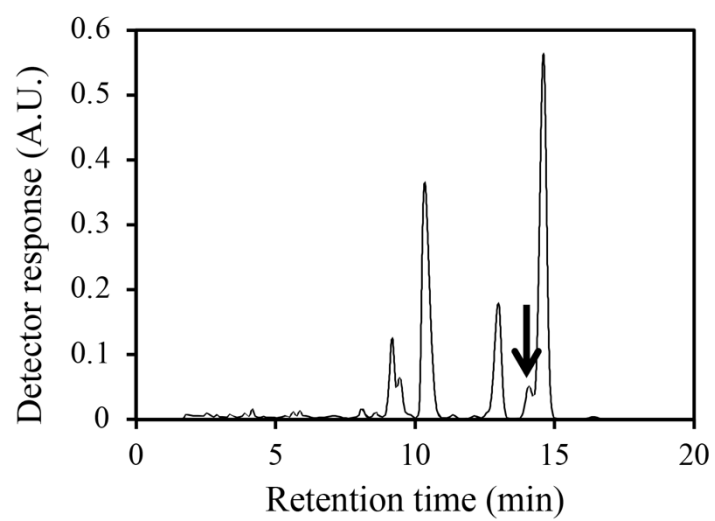

**Supplementary Material Figure S2.** High-performance liquid chromatography chromatogram of the Corydalis Tuber ethanol extract. The arrow indicates the retention time of berberine.

**Supplementary Material Table S3.** Simulated molecular docking binding affinities of eight alkaloid compounds known to be in *Corydalis* Tuber extract to the four efflux pump proteins of *Staphylococcus aureus*.

| Name                | MepA<br>(kcal/mol) | NorA<br>(kcal/mol) | NorB<br>(kcal/mol) | SdrM<br>(kcal/mol) |
|---------------------|--------------------|--------------------|--------------------|--------------------|
| Allocryptopin       | -6.4               | -6.7               | -6.4               | -6.4               |
| Berberine           | -7.9               | -7.6               | -7.8               | -9.4               |
| Coptisine           | -7.1               | -7.8               | -7.1               | -7.0               |
| Corydaline          | -5.7               | -6.1               | -5.8               | -5.9               |
| Dehydrocorydaline   | -6.1               | -6.4               | -6.0               | -6.4               |
| Palmatine           | -6.2               | -7.0               | -5.4               | -5.7               |
| Protopine           | -6.9               | -7.1               | -6.8               | -7.4               |
| Tetrahydropalmatine | -6.0               | -6.1               | -6.2               | -5.9               |

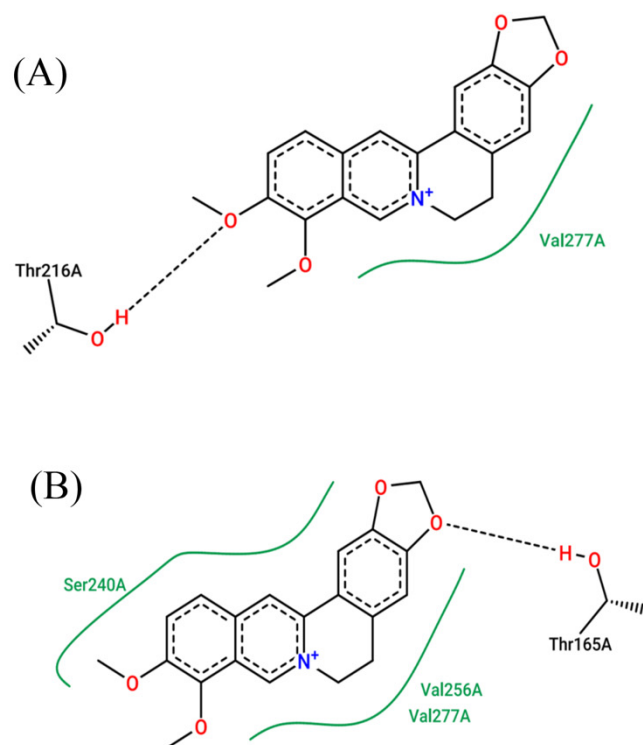

**Supplementary Material Figure S3.** Molecular docking analysis with berberine and the PBP2A protein of *Staphylococcus aureus* ATCC 33593 (A) and *S. aureus* Mu50 (B; PDB code: 4CJN). The curved green lines indicate hydrophobic interactions and the black dotted line shows hydrogen bonds.

|       |     |                     |            |            |            |            |            |
|-------|-----|---------------------|------------|------------|------------|------------|------------|
| 33593 | 1   | MKKIKIVPLI          | LIVVVVGFGI | YFYASKDKEI | NNTIDAIEDK | NFKQVYKDSS | YISKSDNGEV |
| Mu50  | 1   | MKKIKIVPLI          | LIVVVVGFGI | YFYASKDKEI | NNTIDAIEDK | NFKQVYKDSS | YISKSDNGEV |
|       |     |                     |            |            |            |            |            |
| 33593 | 61  | EMTERPIKIY          | NSLGVKDINI | QDRKIKKVSK | NKKRVDAQYK | IKTNYGNIDR | NVQFNFKVED |
| Mu50  | 61  | EMTERPIKIY          | NSLGVKDINI | QDRKIKKVSK | NKKRVDAQYK | IKTNYGNIDR | NVQFNFKVED |
|       |     |                     |            |            |            |            |            |
| 33593 | 121 | GMWKLDWDHS          | VIIPGMQKDQ | SIHIENLKSE | RGKILDRNNV | ELANTGTAYE | IGIVPKNVSK |
| Mu50  | 121 | GMWKLDWDHS          | VIIPGMQKDQ | SIHIENLKSE | RGKILDRNNV | ELANTGTAYE | IGIVPKNVSK |
|       |     |                     |            |            |            |            |            |
|       |     |                     |            | *          |            |            |            |
| 33593 | 181 | KDYKAIAKEL          | SISEDYIKQQ | MDQKQVQDDT | FVPLKTVKKM | DEYLSDFAKK | FHLTNETES  |
| Mu50  | 181 | KDYKAIAKEL          | SISEDYIKQQ | MDQNWVQDDT | FVPLKTVKKM | DEYLSDFAKK | FHLTNETES  |
|       |     |                     |            |            |            |            |            |
|       |     |                     |            | *          |            |            |            |
| 33593 | 241 | RNYPL <b>E</b> KATS | HLLGYVGPIN | SEELKQKEYK | GYKDDAVIGK | KGLEKLYDKK | LQHEDGYRVT |
| Mu50  | 241 | RNYPL <b>G</b> KATS | HLLGYVGPIN | SEELKQKEYK | GYKDDAVIGK | KGLEKLYDKK | LQHEDGYRVT |
|       |     |                     |            |            |            |            |            |
| 33593 | 301 | IVDDNSNTIA          | HTLIEKKKKD | GKDIQLTIDA | KVQKSIYNNM | KNDYGSSTAI | HPQTGELLAL |
| Mu50  | 301 | IVDDNSNTIA          | HTLIEKKKKD | GKDIQLTIDA | KVQKSIYNNM | KNDYGSSTAI | HPQTGELLAL |
|       |     |                     |            |            |            |            |            |
| 33593 | 361 | VSTPSYDVYP          | FMYGMSNEEY | NKLTEDKKEP | LLNKFQITTS | PGSTQKILTA | MIGLNNKTLD |
| Mu50  | 361 | VSTPSYDVYP          | FMYGMSNEEY | NKLTEDKKEP | LLNKFQITTS | PGSTQKILTA | MIGLNNKTLD |
|       |     |                     |            |            |            |            |            |
| 33593 | 421 | DKTSYKIDGK          | GWQKDKSWG  | YNVTRYEVVN | GNIDLKQAIE | SSDNIFFARV | ALELGSKKFE |
| Mu50  | 421 | DKTSYKIDGK          | GWQKDKSWG  | YNVTRYEVVN | GNIDLKQAIE | SSDNIFFARV | ALELGSKKFE |
|       |     |                     |            |            |            |            |            |
| 33593 | 481 | KGMKKLGVGE          | DIPSDYPFYN | AQISNKNLDN | EILLADSGYG | QGEILINPVQ | ILSIYSALEN |
| Mu50  | 481 | KGMKKLGVGE          | DIPSDYPFYN | AQISNKNLDN | EILLADSGYG | QGEILINPVQ | ILSIYSALEN |
|       |     |                     |            |            |            |            |            |
| 33593 | 541 | NGNINAPHL           | KDTKNKVWKK | NIISKENINL | LTDGMQQVVN | KTHKEDIYRS | YANLIGKSGT |
| Mu50  | 541 | NGNINAPHL           | KDTKNKVWKK | NIISKENINL | LTDGMQQVVN | KTHKEDIYRS | YANLIGKSGT |
|       |     |                     |            |            |            |            |            |
| 33593 | 601 | AELKMKQGET          | GRQIGWFISY | DKDNPNMMA  | INVKDVQDKG | MASYNKISG  | KVYDELYENG |
| Mu50  | 601 | AELKMKQGET          | GRQIGWFISY | DKDNPNMMA  | INVKDVQDKG | MASYNKISG  | KVYDELYENG |
|       |     |                     |            |            |            |            |            |
| 33593 | 661 | NKKYDIDE            |            |            |            |            |            |
| Mu50  | 661 | NKKYDIDE            |            |            |            |            |            |

**Supplementary Material Figure S4.** The PBP2A protein amino acid sequences of *Staphylococcus aureus* ATCC 33593 and *S. aureus* Mu50. An asterisk indicates the presence of different amino acids at that position.
